# Supplementary material for: 16S Amplicon Sequencing of Nitrifying Bacteria and Archaea Inhabiting Maize Rhizosphere and the Influencing Environmental Factors
Source: MDPI journal article supplement (doi:10.3390/agriculture12091328), 2022-08-28
Supplement: s1 [file s1]

**Table S1.** 16S amplicon sequence information for maize rhizosphere across different growth stages.

| SAMPLE | DATA BEFORE QC |                           |                          |                    |                                 | DATA AFTER QC |                       |                           |                     |
|--------|----------------|---------------------------|--------------------------|--------------------|---------------------------------|---------------|-----------------------|---------------------------|---------------------|
|        | Size (bp)      | No. of raw sequence reads | Mean sequence length(bp) | Mean GC content(%) | No of artificial duplicate read | Size (bp)     | No. of sequence reads | Mean sequence length (bp) | Mean GC content (%) |
| BU1    | 399998<br>74   | 93132                     | 429 ± 60                 | 59 ± 5             | 78725                           | 55444<br>47   | 13981                 | 397 ± 92                  | 59 ± 4              |
| BU2    | 339592<br>50   | 79190                     | 429 ± 62                 | 58 ± 5             | 66328                           | 49222<br>16   | 12368                 | 398 ± 91                  | 59 ± 4              |
| BU3    | 394392<br>63   | 91569                     | 431 ± 59                 | 58 ± 4             | 78070                           | 52090<br>32   | 13189                 | 395 ± 94                  | 58 ± 4              |
| PR1    | 347650<br>82   | 81200                     | 428 ± 61                 | 59 ± 4             | 68091                           | 50731<br>52   | 12759                 | 398 ± 91                  | 59 ± 4              |
| PR2    | 338905<br>51   | 78866                     | 430 ± 57                 | 59 ± 4             | 66470                           | 48404<br>35   | 12182                 | 397 ± 91                  | 59 ± 4              |
| PR3    | 450883<br>95   | 104815                    | 430 ± 60                 | 58 ± 5             | 89330                           | 59627<br>07   | 14913                 | 400 ± 88                  | 59 ± 4              |
| TA1    | 390883<br>84   | 91384                     | 428 ± 60                 | 58 ± 5             | 77224                           | 53870<br>58   | 13644                 | 395 ± 91                  | 59 ± 4              |
| TA2    | 370520<br>55   | 87143                     | 425 ± 69                 | 58 ± 7             | 73348                           | 50254<br>26   | 12809                 | 392 ± 94                  | 59 ± 4              |
| TA3    | 314582<br>63   | 74393                     | 423 ± 67                 | 58 ± 6             | 61962                           | 45577<br>68   | 11824                 | 385 ± 95                  | 59 ± 4              |
| FR1    | 357286<br>55   | 84510                     | 423 ± 66                 | 58 ± 5             | 69749                           | 54864<br>05   | 14237                 | 385 ± 95                  | 58 ± 4              |
| FR2    | 344999<br>59   | 81697                     | 422 ± 68                 | 58 ± 6             | 66905                           | 53813<br>58   | 14139                 | 381 ± 100                 | 58 ± 5              |
| FR3    | 333578<br>78   | 78587                     | 424 ± 64                 | 58 ± 5             | 65154                           | 50888<br>29   | 13101                 | 388 ± 95                  | 59 ± 4              |

BU- Bulk soil, PR- Pretasseling stage rhizosphere, TA- Tasseling stage rhizosphere, FR- Fruiting stage rhizosphere.

**Table S2:** Beta diversity evaluation of nitrifying bacteria and archaea

|    | BU    | PR    | TA    | FR    | P-value | R    |
|----|-------|-------|-------|-------|---------|------|
| BU | 0.000 | 0.020 | 0.020 | 0.000 | 0.01    | 0.58 |
| PR | 0.020 | 0.000 | 0.000 | 0.020 |         |      |
| TA | 0.020 | 0.000 | 0.000 | 0.020 |         |      |
| FR | 0.000 | 0.020 | 0.020 | 0.000 |         |      |

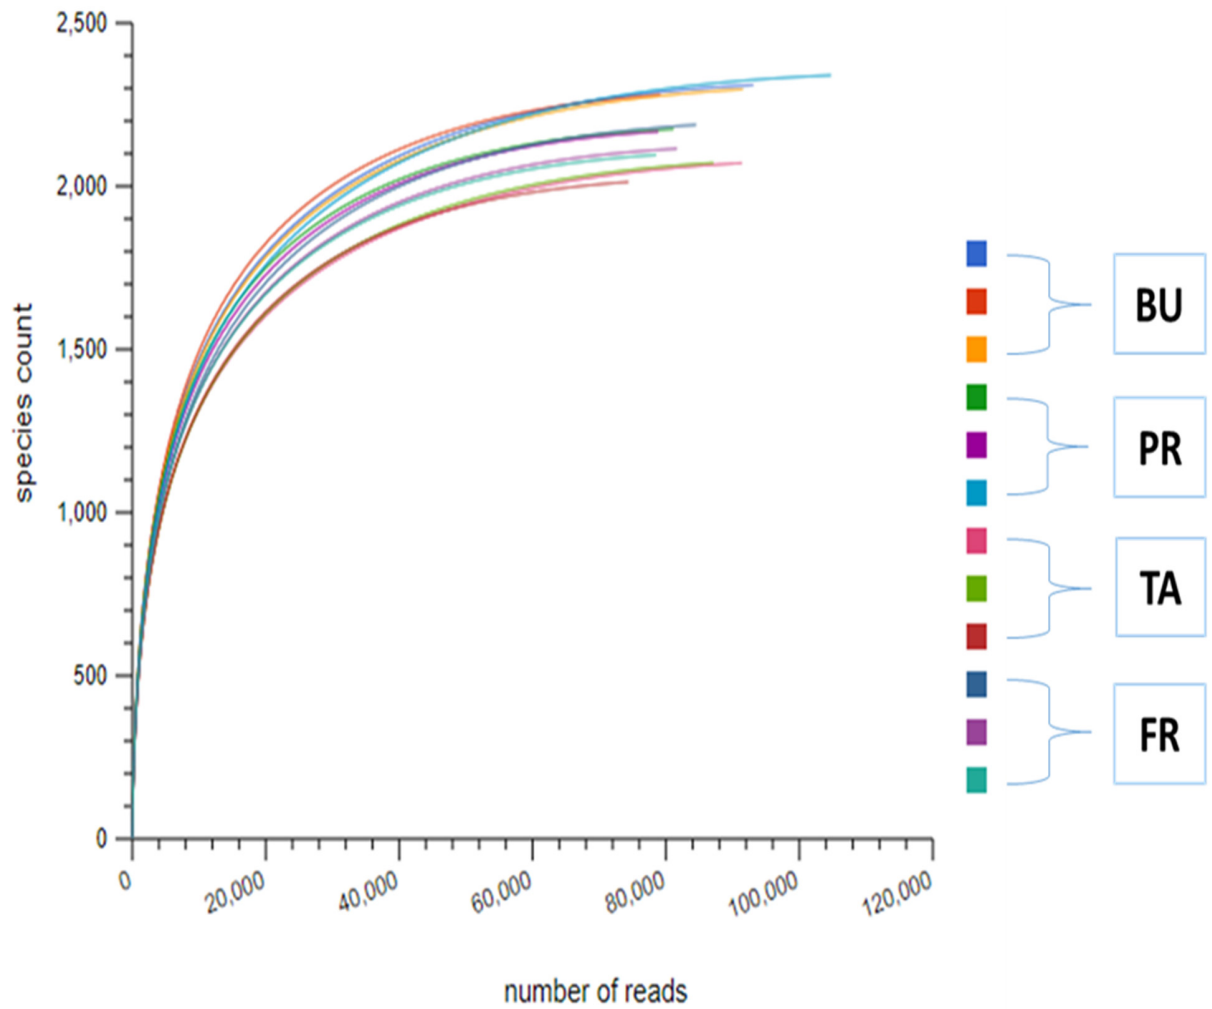

**Figure S1.** Rarefaction curve showing the richness of species sequences across the different vegetative growth. BU= samples from bulk soil, PR= samples from pretasseling growth stage, TA= samples from tassel growth stage, FR= samples from fruiting growth stage.
